# Supplementary material for: Dietary Copper/Zinc Ratio and Type 2 Diabetes Risk in Women: The E3N Cohort Study
Source: MDPI journal article supplement (doi:10.3390/nu13082502), 2021-07-22
Supplement: s1 [file s1]

**Table S1.** Risk of Type 2 diabetes according to quintile groups of dietary Cu and Zn (E3N Cohort data, N=70,991).

|                                                                                                                                                   | Number (%)<br>non-cases | Number (%)<br>cases | M1<br>HR [95% CI] | M2<br>HR [95% CI] | M3<br>HR [95% CI] |
|---------------------------------------------------------------------------------------------------------------------------------------------------|-------------------------|---------------------|-------------------|-------------------|-------------------|
| <b>Copper</b>                                                                                                                                     | N=67699                 | N=3292              |                   |                   |                   |
| Q1 (< 1.99)                                                                                                                                       | 13595 (20.08)           | 604 (18.35)         | Reference         | Reference         | Reference         |
| Q2 (1.99,2.45)                                                                                                                                    | 13581 (20.06)           | 617 (18.74)         | 1.01 [0.90; 1.13] | 0.98 [0.87; 1.09] | 1.03 [0.92; 1.16] |
| Q3 (2.45,2.94)                                                                                                                                    | 13600 (20.09)           | 598 (18.17)         | 0.99 [0.88; 1.10] | 0.86 [0.77; 0.96] | 0.95 [0.84; 1.07] |
| Q4 (2.94,3.67)                                                                                                                                    | 13523 (19.98)           | 675 (20.50)         | 1.14 [1.02; 1.27] | 0.96 [0.86; 1.07] | 1.10 [0.98; 1.24] |
| Q5 ( $\geq$ 3.67)                                                                                                                                 | 13400 (19.79)           | 798 (24.24)         | 1.40 [1.26; 1.56] | 1.01 [0.91; 1.13] | 1.25 [1.10; 1.43] |
| <b>Zinc</b>                                                                                                                                       | N=67699                 | N=3292              |                   |                   |                   |
| Q1 (< 9.85)                                                                                                                                       | 13715 (20.26)           | 483 (14.67)         | Reference         | Reference         | Reference         |
| Q2 (9.85,10.81)                                                                                                                                   | 13682 (20.21)           | 516 (15.67)         | 1.07 [0.94; 1.21] | 0.99 [0.88; 1.12] | 1.01 [0.89; 1.14] |
| Q3 (10.81,11.74)                                                                                                                                  | 13499 (19.94)           | 700 (21.26)         | 1.47 [1.31; 1.65] | 1.20 [1.07; 1.35] | 1.23 [1.09; 1.38] |
| Q4 (11.74,13.00)                                                                                                                                  | 13464 (19.89)           | 734 (22.30)         | 1.55 [1.38; 1.74] | 1.24 [1.10; 1.39] | 1.27 [1.13; 1.42] |
| Q5 ( $\geq$ 13.00)                                                                                                                                | 13339 (19.70)           | 859 (26.09)         | 1.86 [1.66; 2.08] | 1.34 [1.19; 1.50] | 1.35 [1.21; 1.52] |
| M1: Adjusted for age (as the time-scale)                                                                                                          |                         |                     |                   |                   |                   |
| M2: M1+ family history of diabetes, smoking status, physical activity, educational level, hypercholesterolemia, hypertension, and body mass index |                         |                     |                   |                   |                   |
| M3: M2+ total energy                                                                                                                              |                         |                     |                   |                   |                   |

**Table S2.** Risk of Type 2 diabetes according to quintile groups of dietary Cu -Zn ratio (E3N Cohort data, N=70,991).

|                                                                                                                                                   | Number (%)<br>non-cases | Number (%)<br>cases | M1<br>HR [95% CI] | M2<br>HR [95% CI] | M3<br>HR [95% CI] |
|---------------------------------------------------------------------------------------------------------------------------------------------------|-------------------------|---------------------|-------------------|-------------------|-------------------|
| <b>Zn ≤ 8 mg/day</b>                                                                                                                              | N=8560                  | N=330               |                   |                   |                   |
| Q1 (< 0.18)                                                                                                                                       | 1369 (15.99)            | 56 (16.97)          | Reference         | Reference         | Reference         |
| Q2 (0.18,0.22)                                                                                                                                    | 1292 (15.09)            | 59 (17.88)          | 1.10 [0.76; 1.59] | 0.95 [0.65; 1.37] | 1.05 [0.72; 1.53] |
| Q3 (0.22,0.27)                                                                                                                                    | 1435 (16.76)            | 47 (14.24)          | 0.80 [0.54; 1.18] | 0.76 [0.51; 1.12] | 0.89 [0.60; 1.34] |
| Q4 (0.27,0.33)                                                                                                                                    | 1679 (19.61)            | 62 (18.79)          | 0.93 [0.65; 1.34] | 0.85 [0.59; 1.22] | 1.07 [0.71; 1.60] |
| Q5 (≥ 0.34)                                                                                                                                       | 2785 (32.54)            | 106 (32.12)         | 1.00 [0.72; 1.38] | 0.86 [0.62; 1.20] | 1.27 [0.81; 1.99] |
| <b>Zn &gt; 8 mg/day</b>                                                                                                                           | N=59139                 | N=2962              |                   |                   |                   |
| Q1 (< 0.18)                                                                                                                                       | 12157 (20.56)           | 616 (20.80)         | Reference         | Reference         | Reference         |
| Q2 (0.18,0.22)                                                                                                                                    | 12272 (20.75)           | 575 (19.41)         | 0.94 [0.83; 1.05] | 0.85 [0.76; 0.95] | 0.86 [0.77; 0.97] |
| Q3 (0.22,0.27)                                                                                                                                    | 12144 (20.53)           | 572 (19.31)         | 0.95 [0.85; 1.06] | 0.86 [0.77; 0.96] | 0.89 [0.79; 1.01] |
| Q4 (0.27,0.33)                                                                                                                                    | 11851 (20.04)           | 606 (20.46)         | 1.03 [0.92; 1.15] | 0.88 [0.79; 0.99] | 0.94 [0.83; 1.07] |
| Q5 (≥ 0.34)                                                                                                                                       | 10715 (18.12)           | 593 (20.02)         | 1.15 [1.02; 1.28] | 0.93 [0.83; 1.04] | 1.07 [0.93; 1.24] |
| M1: Adjusted for age (as the time-scale)                                                                                                          |                         |                     |                   |                   |                   |
| M2: M1+ family history of diabetes, smoking status, physical activity, educational level, hypercholesterolemia, hypertension, and body mass index |                         |                     |                   |                   |                   |
| M3: M2+ total energy                                                                                                                              |                         |                     |                   |                   |                   |
